# Supplementary material
Source: HighWire-hosted journal article supplement (https://www.cmaj.ca/highwire/filestream/148899/field_highwire_adjunct_files/3/221512-res-4-at.pdf)
Supplement: 221512-res-4-at.pdf [file 221512-res-4-at.pdf]

**Supplementary Table 3:** Logistic regression for the odds of cancers diagnosed at higher stage during SOE vs. before SOE, adjusting for time trend and seasonality

| Cancer     | Ordinal logistic regression |       | Stage III, IV vs Stage I, II |       | Stage IV vs Stage I, II, III |       |
|------------|-----------------------------|-------|------------------------------|-------|------------------------------|-------|
|            | OR (95% CI)                 | p-val | OR (95% CI)                  | p-val | OR (95% CI)                  | p-val |
| Bladder    | 1.04 (0.77, 1.41)           | 0.80  | 0.71 (0.43, 1.16)            | 0.17  | 0.61 (0.30, 1.22)            | 0.16  |
| Breast     | 1.15 (0.96, 1.38)           | 0.12  | 1.14 (0.89, 1.46)            | 0.29  | 1.34 (0.93, 1.92)            | 0.11  |
| Cervix     | 0.89 (0.45, 1.78)           | 0.75  | 0.73 (0.27, 2.02)            | 0.54  | 2.11 (0.45, 9.85)            | 0.34  |
| Colorectal | 1.17 (0.96, 1.43)           | 0.11  | 1.13 (0.90, 1.41)            | 0.30  | 1.12 (0.87, 1.44)            | 0.36  |
| Kidney     | 1.11 (0.77, 1.59)           | 0.59  | 0.98 (0.66, 1.44)            | 0.91  | 1.24 (0.73, 2.11)            | 0.43  |
| Lung       | 0.97 (0.81, 1.16)           | 0.71  | 0.98 (0.79, 1.20)            | 0.82  | 0.98 (0.81, 1.18)            | 0.82  |
| Melanoma   | 1.35 (0.93, 1.95)           | 0.11  | 1.42 (0.90, 2.26)            | 0.14  | 1.25 (0.57, 2.74)            | 0.58  |
| NHL        | 1.11 (0.82, 1.51)           | 0.49  | 0.95 (0.67, 1.35)            | 0.77  | 1.23 (0.88, 1.72)            | 0.22  |
| Prostate   | 1.49 (1.22, 1.81)           | <.001 | 1.58 (1.27, 1.96)            | <.001 | 1.42 (1.09, 1.86)            | 0.01  |
| Uterus     | 1.14 (0.76, 1.71)           | 0.51  | 1.16 (0.74, 1.81)            | 0.52  | 1.06 (0.56, 2.00)            | 0.87  |
